# Supplementary material for: Copper Ion Mediates Yeast-to-Hypha Transition in Yarrowia lipolytica
Source: MDPI journal article supplement (doi:10.3390/jof9020249), 2023-02-13
Supplement: s1 [file s1]

Table S3. Strains and plasmids used in this study.

| Plasmid/Strain    | Description                                                                                                                                                                                                                                                        | Source          |
|-------------------|--------------------------------------------------------------------------------------------------------------------------------------------------------------------------------------------------------------------------------------------------------------------|-----------------|
| W29               | Wild-type <i>Y. lipolytica</i> strain                                                                                                                                                                                                                              |                 |
| Po1f              | MatA, leu2-270, ura3-302, xpr2-322, axp1-2, Leu <sup>−</sup> , Ura <sup>−</sup> , ΔAEP, ΔAXP                                                                                                                                                                       | 1               |
| Po1f-TLL          | Po1f derivative, carrying a TLL expression cassettes                                                                                                                                                                                                               | this laboratory |
| pUAxp7166-ROL     | Data not published                                                                                                                                                                                                                                                 | this laboratory |
| pUAxp7166-D11653g | pUAxp7166-ROL derivative, carrying YALI1_D11653g gene                                                                                                                                                                                                              | this study      |
| pCRISPRyl         | CRISPR/Cas9 vector for <i>Y. lipolytica</i> , with AvrII site for sgRNA insertion                                                                                                                                                                                  | 2               |
| pCRISPRyl-mhy1    | Po1f derivative, carrying the sgRNA sequence of mhy1                                                                                                                                                                                                               | this study      |
|                   | <b>Reference</b>                                                                                                                                                                                                                                                   |                 |
| 1                 | Madzak C, Tréton B, Blanchin-Roland S. Strong hybrid promoters and integrative expression/secretion vectors for quasi-constitutive expression of heterologous proteins in the yeast <i>Yarrowia lipolytica</i> . J Mol Microbiol Biotechnol. 2000 Apr;2(2):207-16. |                 |
| 2                 | Schwartz CM, Hussain MS, Blenner M, Wheeldon I. Synthetic RNA Polymerase III Promoters Facilitate High-Efficiency CRISPR-Cas9-Mediated Genome Editing in <i>Yarrowia lipolytica</i> . ACS Synth Biol. 2016 Apr 15;5(4):356-9.                                      |                 |
