# Supplementary material for: Copper Ion Mediates Yeast-to-Hypha Transition in Yarrowia lipolytica
Source: MDPI journal article supplement (doi:10.3390/jof9020249), 2023-02-13
Supplement: s1 [file s1]

Table S4. Oligonucleotide sequences of primers used in this study.

| Primer         | Sequence (5'→3')a                                                  |
|----------------|--------------------------------------------------------------------|
| N-D11653g-F    | CACATACAACCACACACATCCACAGCGGCCGCCACCATGGCTCACATCCGCTTTGC           |
| C-D11653g-R    | GTGGGGACAGGCCATGGAATCGATCTAATAGATGTAAAAGAACGTGATATGGACCGT          |
| Nsi1-D11653-F  | TTGGACGATGATGCTTTGAGGGC                                            |
| Nsi1-D11653-R  | GCCCTCAAAGCATCATCGTCCAA                                            |
| N-A00204-F     | CACATACAACCACACACATCCACAGCGGCCGCCACCATGCCCCGACTCTGCTGAACTC         |
| C-A00240-R     | GTGGGGACAGGCCATGGAATCGATTCTAGTGACAGGAGCGTCGGTA                     |
| N-B07500-F     | CACATACAACCACACACATCCACAGCGGCCGCCACCATGCCTGACGCTCGACTCT            |
| C-B07500-R     | GTGGGGACAGGCCATGGAATCGATCTACTGGAAAAATCGGCATTGCCG                   |
| Nsi1-B07500-F  | CCTGTGGAATGCACTTCGACAATGT                                          |
| Nsi1-B07500-R  | ACATTGTGCAAGTGCATTCCACAGG                                          |
| N-B09266g-F    | CACATACAACCACACACATCCACAGCGGCCGCCACCATGTCTTGGAAGGTGAGCAG           |
| C-B09266-R     | GTGGGGACAGGCCATGGAATCGATCTAATAGTTAGCATTGATGAGATAATCTCCAGAGC        |
| N-B17569-F     | CACATACAACCACACACATCCACAGCGGCCGCCACCATGTCTGAAAAGGTGAAAATTGAAGCCAAG |
| C-B17569-R     | GTGGGGACAGGCCATGGAATCGATTTACTCATAAACTTGCGGTGAGTTCAC                |
| N-B19429g-F    | CACATACAACCACACACATCCACAGCGGCCGCCACCATGCAGTTCTCCGCCGC              |
| C-B19429-R     | GTGGGGACAGGCCATGGAATCGATTTAGATGAGCTGAGCAAGAGCACC                   |
| N-B19932-F     | CACATACAACCACACACATCCACAGCGGCCGCCACCATGGTCGCCACTGTTTCAGC           |
| C-B19932-R     | GTGGGGACAGGCCATGGAATCGATTTATTTGTTGGCCTTCTCGAAGTACTCC               |
| N-C08017g-F    | CACATACAACCACACACATCCACAGCGGCCGCCACCATGTCCTACACCCGAGTCACT          |
| C-C08017-R     | GTGGGGACAGGCCATGGAATCGATCTACAGCTTGCTGTCCAGCTTG                     |
| N-C12900-F     | CACATACAACCACACACATCCACAGCGGCCGCCACCATGTCTGTCTCCAAGGTGAGTATTTGAAG  |
| C-C12900-R     | GTGGGGACAGGCCATGGAATCGATTTAGGCGCCAAGGGCG                           |
| N-C18396-F     | CACATACAACCACACACATCCACAGCGGCCGCCACCATGTACAACAACACACGGGGG          |
| C-C18396-R     | GTGGGGACAGGCCATGGAATCGATTCAACACCATTTGCCTCCACAC                     |
| N-C23738-F     | CACATACAACCACACACATCCACAGCGGCCGCCACCATGCACGGTCTCAATCAGTCAGCA       |
| C-C23738-R     | GTGGGGACAGGCCATGGAATCGATTTAGTACTTGGCCAGAGGTGCGTG                   |
| N-C25515-F     | CACATACAACCACACACATCCACAGCGGCCGCCACCATGGGCAATTTTTGCCCGTCC          |
| C-C25515-R     | GTGGGGACAGGCCATGGAATCGATCTAATGCTGAGCCTCAGGACGAAT                   |
| N-C27382g-F    | CACATACAACCACACACATCCACAGCGGCCGCCACCATGAGCAAGCGCCAGAATGAC          |
| C-C27382g-R    | GTGGGGACAGGCCATGGAATCGATCTATTTCAACTGGCTCTTGAGCCC                   |
| C27382g-Nsi1-F | GACATAGCATGTATGGTGCTTGAC                                           |
| C27382-Nsi1-R  | GTCAAGCACCATACATGCTATGTC                                           |
| N-C28396g-F    | CACATACAACCACACACATCCACAGCGGCCGCCACCATGCACATTTCACTAATCGCAATCAC     |
| C-C28396-R     | GTGGGGACAGGCCATGGAATCGATCTAACAGCAACAATCCTCGCCC                     |
| N-C32461-F     | CACATACAACCACACACATCCACAGCGGCCGCCACCATGACAACCTTCTATCTCGGCTACT      |
| C-C32461-R     | GTGGGGACAGGCCATGGAATCGATTCAAAAAGCTGCGAGACAGCCG                     |
| N-D01548-F     | CACATACAACCACACACATCCACAGCGGCCGCCACCATGGCGCGCAAAACGGAC             |
| C-D01548-R     | GTGGGGACAGGCCATGGAATCGATCTACATAATCACTTGATTCCAGCCCCT                |
| Nsi1-D01548-F  | CACAAACACCATGCTTCAATGTCCA                                          |
| Nsi1-D01548-R  | TGGACATTGAAGCATGGTGTGTTGTG                                         |
| N-D01581g-F    | CACATACAACCACACACATCCACAGCGGCCGCCACCTTAATTCCACCCAATGACTCCATCTCC    |
| C-D01581g-R    | GTGGGGACAGGCCATGGAATCGATATGTGCGGACCCTCAAGAAAC                      |

N-D08564g-F CACATACAACCACACACATCCACAGCGGCCGCCACCATGGCCAACGCGTTTTCC  
 C-D08564-R GTGGGGACAGGCCATGGAATCGATTTAGGCAACCTCCTTTCGTTCG  
 N-D09712g-F CACATACAACCACACACATCCACAGCGGCCGCCACCATGTTCCGTGTCTGGTTGCC  
 C-D09712-R GTGGGGACAGGCCATGGAATCGATCTATACATTACAAATTAGTGCATGGTGCTTTTC  
 N-D10458g-F CACATACAACCACACACATCCACAGCGGCCGCCACCATGTCCAAAGCAGTAGGAATTGATCTTGG  
 C-D10458-R GTGGGGACAGGCCATGGAATCGATTTAGTCAACCTCCTCAACGGTGG  
 N-E03723-F CACATACAACCACACACATCCACAGCGGCCGCCACCATGAACGTCATATTCGAAAACACGCC  
 C-E03723-R GTGGGGACAGGCCATGGAATCGATTCAACGGTTTTCGAGGACCG  
 N-E04033g-F CACATACAACCACACACATCCACAGCGGCCGCCACCATGGCACCCTAACAAAGTCGC  
 C-E04033-R GTGGGGACAGGCCATGGAATCGATCTACTGGGCCAGAATGGACTTGAC  
 N-E20229g-F CACATACAACCACACACATCCACAGCGGCCGCCACCATGAACTTCGACTATGACTTTCTGCAGT  
 C-E20229-R GTGGGGACAGGCCATGGAATCGATCTAATGTCCTTCGAAGTCCGGTGAAG  
 N-E34205-F CACATACAACCACACACATCCACAGCGGCCGCCACCATGGCTGAAGATAAGGTGTTTGAAGTGG  
 C-E34205-R GTGGGGACAGGCCATGGAATCGATTTAGAAAATCGTCCTCATCCACGATGAAC  
 N-E36937-F CACATACAACCACACACATCCACAGCGGCCGCCACCATGAAACGAACTCGAGTGGTCAAG  
 C-E36937-R GTGGGGACAGGCCATGGAATCGATTCAATCTTCACTCTTGGCCAGC  
 NsiI-E36937-1F CCAGAGGAACATGCTTTCAAGGTC  
 NsiI-E36937-1R GACCTTGAAAGCATGTTCTCTGG  
 NsiI-E36937-2F GAAATCCCCATGCACATGCGC  
 NsiI-E36937-2R GCGCATGTGCATGGGGATTTC  
 N-E37419-F CACATACAACCACACACATCCACAGCGGCCGCCACCATGATTCTCGTCCAGGGCGAAA  
 C-E37419-R GTGGGGACAGGCCATGGAATCGATCTACTCCCAAGTAAACCTCTCCCCT  
 NsiI-E37419-F CCGAGTCGTATGCACGGAAATGGA  
 NsiI-E37419-R TCCATTTCCGTGCATACGACTCGG  
 N-F06904g-F CACATACAACCACACACATCCACAGCGGCCGCCACCATGAAAAACGTCATTTACTTTTGAAGTGAGT  
 C-F06904-R GTGGGGACAGGCCATGGAATCGATTCAATTGTTAATGTTTCTCCACTCGGACT  
 N-F17805-F CACATACAACCACACACATCCACAGCGGCCGCCACCATGGACCATCTCTCTCAAGCAGG  
 C-F17805-R GTGGGGACAGGCCATGGAATCGATCTAGAAAATGACACTCTTGCCACTCTG  
 N-F28222g-F CACATACAACCACACACATCCACAGCGGCCGCCACCATGGAATCGTCGGGTATCTGTGC  
 C-F28222g-R GTGGGGACAGGCCATGGAATCGATTAGCCAGAGTTTACTCGCGAG  
 N-F29317-F CACATACAACCACACACATCCACAGCGGCCGCCACCATGAGTACCCCTCCTTATTACAACATCTACC  
 C-F29317-R GTGGGGACAGGCCATGGAATCGATTTACGCATCACCGGCCT  
 N-F31672g-F CACATACAACCACACACATCCACAGCGGCCGCCACCATGCAGCTCTCAGCCCTCG  
 C-F31672-R GTGGGGACAGGCCATGGAATCGATTTAGATGAGGAGGGCGGCG  
 N-F31687-F CACATACAACCACACACATCCACAGCGGCCGCCACCCTAGCTTGCGTAACGGGCA  
 C-F31687g-R GTGGGGACAGGCCATGGAATCGATATGAGCCACGACCACGG  
 N-F39789-F CACATACAACCACACACATCCACAGCGGCCGCCACCATGCGCCTGGAGCTGC  
 C-F39789-R GTGGGGACAGGCCATGGAATCGATTCAAGTGTCTAGGTCGGTGATGG  
 CX7166-F GATCTACTGATCACGGGCAAAAGTGC  
 CX7166-R GGTGGTGGGAAGAACACCG  
 T-R GATAAGCTGTCAAACATGAGAATTTCGG  
 mhyI-CX-F TACCACGCTTTCCCCACGAC  
 mhyI-CX-R AGATGGAAACGGCGTCCTTCTC  
 ver-mhyI-R AATTCCCGTCTTGCAATTCCA

|          |                                          |
|----------|------------------------------------------|
| verF     | CCCCAGTTGCAAAAGTTGACAC                   |
| mhy1-sgF | GGGTCGGCGCAGGTTGACGTCACCCTTCGAGGCCAGATGT |
| mhy1-sgR | GCTATTTCTAGCTCTAAAACACATCTGGCCTCGAAGGGTG |

---
