# Supplementary material for: Copper Ion Mediates Yeast-to-Hypha Transition in Yarrowia lipolytica
Source: MDPI journal article supplement (doi:10.3390/jof9020249), 2023-02-13
Supplement: s1 [file s1]

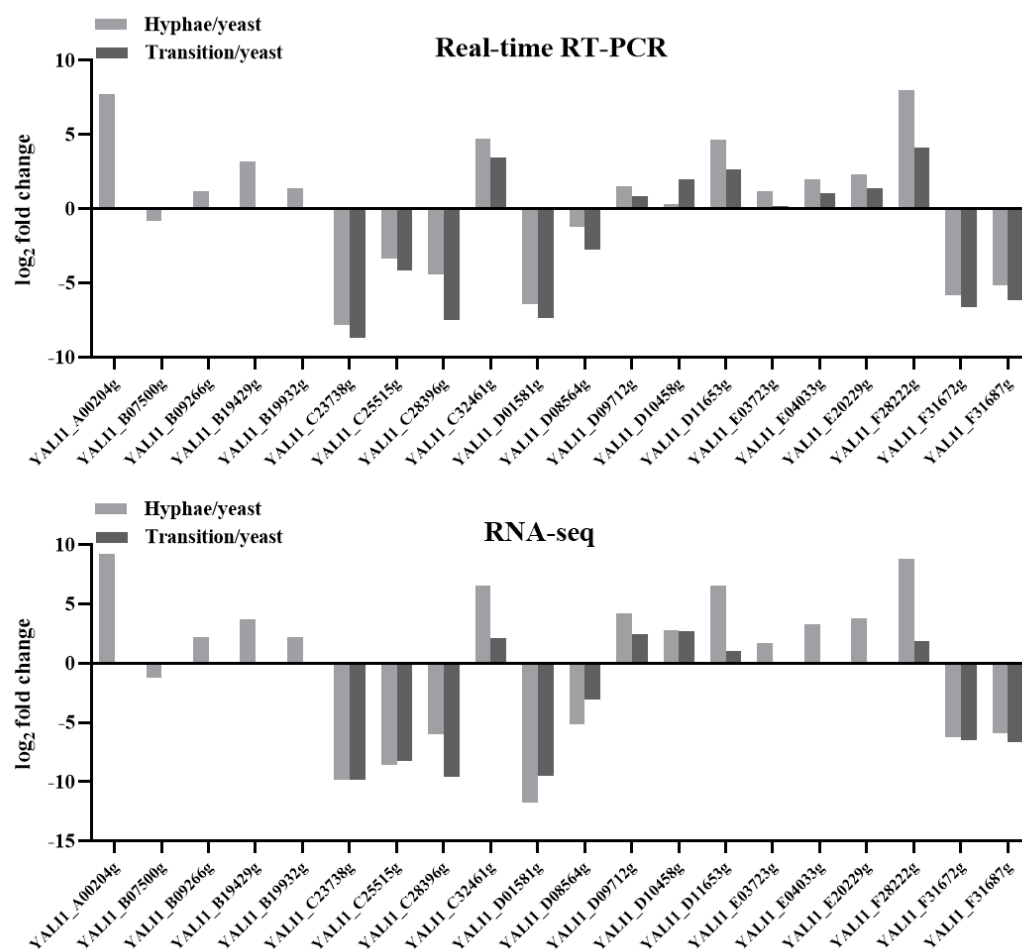

**Figure S1. Fluorescent real-time RT-PCR validation of 20 differentially expressed genes in RNA-Seq.** *ACT1*(YALI0D08272g) was used as the reference gene to normalize the gene expression in fluorescent real-time RT-PCR.
