# Supplementary material for: Copper Ion Mediates Yeast-to-Hypha Transition in Yarrowia lipolytica
Source: MDPI journal article supplement (doi:10.3390/jof9020249), 2023-02-13
Supplement: s1 [file s1]

Table S5. Primers used for Fluorescent real-time RT-PCR in this study.

| Primer   | Sequence (5'→3')a       |
|----------|-------------------------|
| A00204-F | AACGTAGCTACCCTTCTGGAAC  |
| A00204-R | CATTCTCATCCAGCCAAGCTTC  |
| B07500-F | ATGACCAAGGAGCATCAGGATG  |
| B07500-R | GCCGTTTCGATCCTTCTTCTTG  |
| B09266-F | GTTGACAACCTGGTTGGATCTG  |
| B09266-R | GAAGTACTTCTGGCCAGCAATG  |
| B17569-F | TACAGCAGATTGTCACGTCCAA  |
| B17569-R | CTTGTCTTCGAGCTCACTGACT  |
| B19429-F | CAGAAGACTCGGCCTTGGAAG   |
| B19429-R | CTTCTTCTGCTGTCATTGGCTC  |
| B19932-F | CCAAGGACTACGGTGTTCTCAT  |
| B19932-R | TCTCAGTGAAGCTGGAAGGCATC |
| B21538-F | TGGAATGAAGCTAACGGAACCA  |
| B21538-R | GATGAATCCGACCACAGCAATG  |
| C08017-F | GTTGCTGGCGGAATTAAGTCTG  |
| C08017-R | TTACCACCGGCAATACCAATGA  |
| C12900-F | GAGTACCTTGCCGAGCAGAAG   |
| C12900-R | AATCTCGAGCAGAACCTTCTCC  |
| C18396-F | TCGATATGGCAGACACAAGGAC  |
| C18396-R | GCTGAGACTGACCTCGAGTATG  |
| C23738-F | GGTCAGACAAATTGCTCTGCAG  |
| C23738-R | CTTGGCAATCTCCTCCTTGAGT  |
| C25515-F | GCTAAGCGCACGTATCTCTCTA  |
| C25515-R | ACCAGAAACCGGACACATTGTA  |
| C27382-F | TGAGTGAGGATGAGGAGGGAAT  |
| C27382-R | CCAATCGAGTCTCCAAGACCTC  |
| C28396-F | GACTGGCCCTTCTTAGACAGAC  |
| C28396-R | GCAACAGTCACTCGGATTAGGT  |
| C32461-F | CTGCAACCATCAAGGCTCTAGA  |
| C32461-R | GAAGGTGTTACTGCAAGGGAGA  |
| D01548-F | CAGATTGACTTCTTCCTGGGCT  |
| D01548-R | CTGTCCACCTGTATGACACTCC  |
| D01581-F | TGGGATCCACTTCAGACACAAG  |
| D01581-R | TCTCAGTTACAAAGTCGAGCCC  |
| D08564-F | CTACTCGCTGGACAAGGATCTC  |
| D08564-R | GGGTCTTGGCAATCTTGATTCTG |
| D09712-F | TTGCCCAGAAGAACGGTACC    |
| D09712-R | CGTTGGCAATGGAGTAGGAGG   |
| D10458-F | AGATCACCATCACCAACGACAA  |
| D10458-R | TGAGAGAGTAGGCGTAGGACTC  |
| D11653-F | CGGAAGCGAACGAATCTACCAA  |

|          |                        |
|----------|------------------------|
| D11653-R | ATGCAGACTTGGATACCGAGGA |
| E03723-F | TAGTGATCTTCATGTACGCGCA |
| E03723-R | TACAGCAGCATCAAATCCCTGT |
| E04033-F | ACCCTCGCTGAGATTGATGATC |
| E04033-R | TCCTTGTCGAACACCTGGAATC |
| E20229-F | GAAGACGGCAAGTTTCTGTGTC |
| E20229-R | TCTTGAGATCGTGCTGTCTGAC |
| E34205-F | ATTGATATCCGGGCCTTCTACG |
| E34205-R | GCATCTTGGATGCTTTGCACTT |
| E36937-F | TGTGACTCGAAAGGTGAATCGT |
| E36937-R | TCCAGTAGAACCAGCAGTTGAC |
| E37419-F | CTGCTGCACATATCAACCACAG |
| E37419-R | CGGCTGCTGGTAATAACTGTTG |
| F29317-F | CATAGGAACAGCTCTCACGGAG |
| F29317-R | TAGGTATGCAATTCGCCCTTGA |
| F06904-F | ACTATAAGAAGCTTCCTCGGCC |
| F06904-R | CGACTTGAGCTTGACGACATTC |
| F17805-F | TCGCTGGTCATGAAGAACATCA |
| F17805-R | CAGATTGACGCTCATTGGACAC |
| F28222-F | TTGAGGTCGTCAATCAGAGTGG |
| F28222-R | ACCCTTGACATCATCACTCACC |
| F31672-F | CAAGATCGGTGAGCGATTCAAG |
| F31672-R | GCCGTAAAGCACCTTACTGAAG |
| F31687-F | GAGCTCATCCTCGATATCTCGC |
| F31687-R | GAAGCTCATCAAGTGTGGCAAG |
| F39789-F | CCTCATGACACACCACAACAAC |
| F39789-R | GACCATCACACAGAGTCACCAA |
| ACT-F    | CTGGCCGAGATCTTACCGAC   |
| ACT-R    | CATCGGGAAGCTCGTAGGAC   |

---
